# Supplementary material for: Characterization of Microbial Communities from the Alimentary Canal of Typhaea stercorea (L.) (Coleoptera: Mycetophagidae)
Source: MDPI journal article supplement (doi:10.3390/insects13080685), 2022-07-29
Supplement: s1 [file s1]

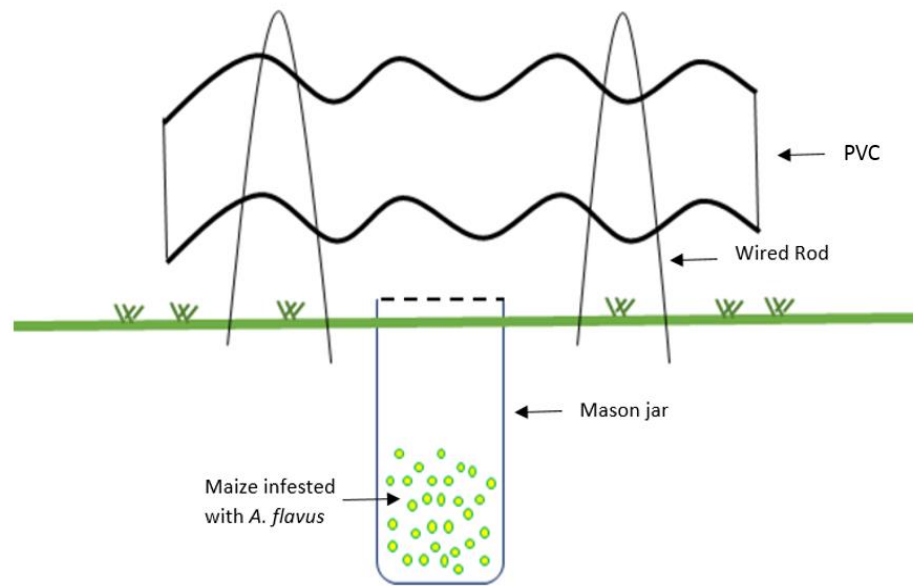

**Figure S1.** Diagram of the pitfall trap used to attract field strains of *T. stercorea*.

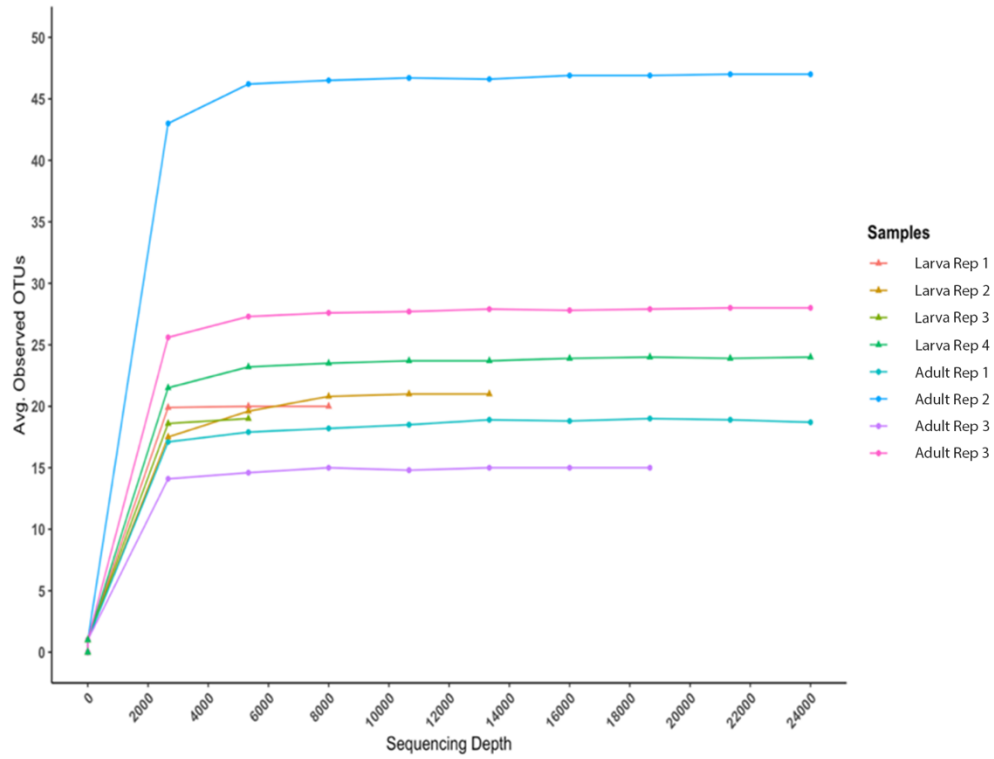

**Figure S2.** Alpha-rarefaction curve of the averaged observed OTUs detected in the *T. stercorea*'s alimentary canal. The sequence data were rarefied to a sequence depth of 7848 sequence count, and results are plotted as an alpha-rarefaction curve using a max depth of 24,000. Each line represents individual samples of either laboratory-reared larvae or adults. Filled triangles (▲) denote larvae and filled circles (●) denote adults.

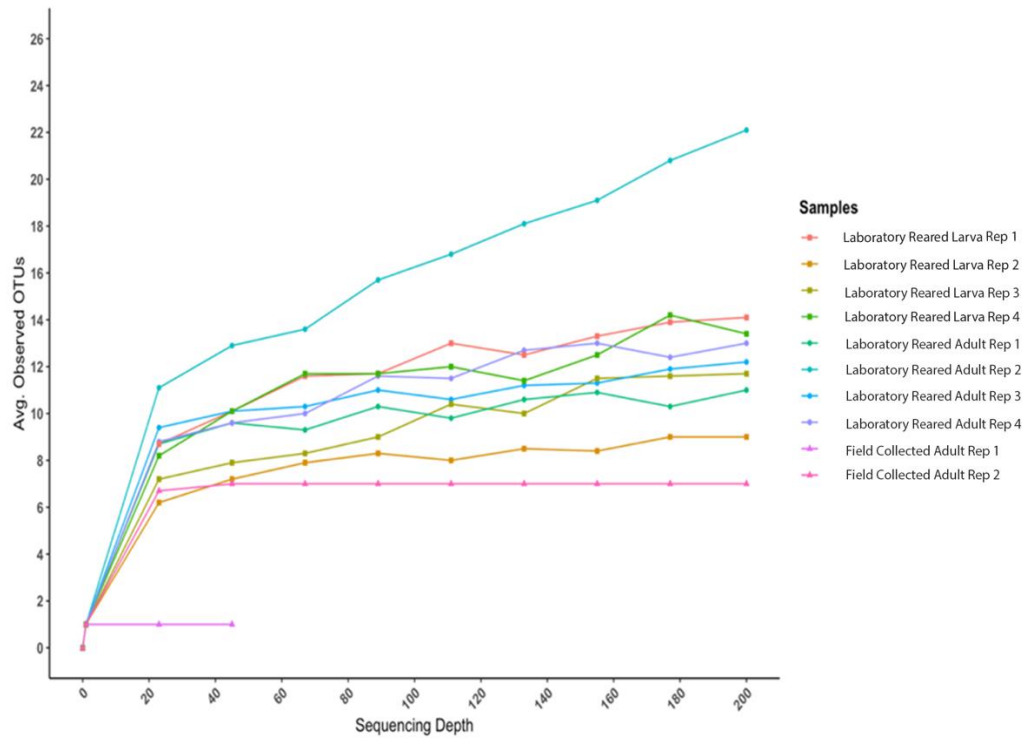

**Figure S3.** Alpha-rarefaction curve of the averaged observed OTUs detected in *T. stercora*'s alimentary canal. The sequence data were rarefied to a sequence depth of 66 sequence count, and results are plotted as an alpha-rarefaction curve using a max depth of 200. Each line represents individual samples of either laboratory-reared larvae, laboratory-reared adults or field-collected adults. Filled squares (■) denote laboratory-reared larvae, filled circles (●) denote laboratory-reared adults, and filled triangles (▲) denote field-collected adults.
